# Supplementary material
Source: MDPI journal article supplement (https://www.mdpi.com/2039-4713/13/2/18)
Supplement: s1 [file s1]

# Transcriptional Alterations Induced by Delta-9 Tetrahydrocannabinol in the Brain and Gonads of Adult Medaka

Marlee Vassall<sup>1</sup>, Sourav Chakraborty<sup>1</sup>, Yashi Feng<sup>1</sup>, Mehwish Faheem<sup>1</sup>, Xuegeng Wang<sup>1,2</sup>,  
Ramji Kumar Bhandari<sup>1,‡</sup>

1) Department of Biology, University of North Carolina Greensboro, NC 27412, United States

2) Institute of Modern Aquaculture Science and Engineering, College of Life Sciences, South China Normal University, Guangzhou 510631, China

\*Corresponding Author: [rkbhanda@uncg.edu](mailto:rkbhanda@uncg.edu)

## Supplemental Figures

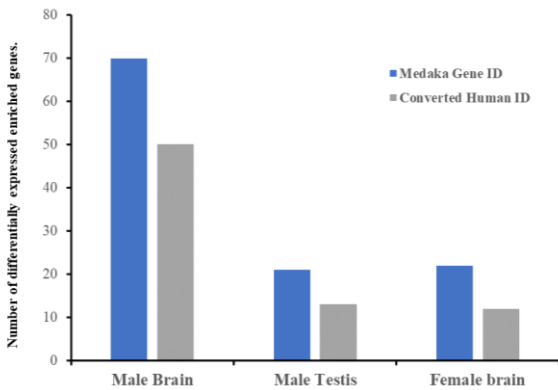

Supplementary Figure S1. The human ortholog of medaka genes in the male brain, testis, and female brain. Y axis indicates the number of differentially expressed genes enriched.

2A

| Target name                                              | Term ID    | P(adj)                 | $-\log_{10}(\text{Padj})$ |
|----------------------------------------------------------|------------|------------------------|---------------------------|
| structural constituent of muscle                         | GO:0008307 | $3.234 \times 10^{-7}$ |                           |
| oxidoreduction-driven active transmembrane transpor...   | GO:0015453 | $3.076 \times 10^{-4}$ |                           |
| primary active transmembrane transporter activity        | GO:0015399 | $1.803 \times 10^{-3}$ |                           |
| cytochrome-c oxidase activity                            | GO:0004129 | $4.341 \times 10^{-3}$ |                           |
| electron transfer activity                               | GO:0009055 | $5.034 \times 10^{-3}$ |                           |
| oxidoreductase activity, acting on a heme group of do... | GO:0016675 | $5.146 \times 10^{-3}$ |                           |
| proton transmembrane transporter activity                | GO:0015078 | $5.649 \times 10^{-3}$ |                           |
| structural molecule activity                             | GO:0005198 | $6.276 \times 10^{-3}$ |                           |
| active ion transmembrane transporter activity            | GO:0022853 | $1.520 \times 10^{-2}$ |                           |
| active transmembrane transporter activity                | GO:0022804 | $1.892 \times 10^{-2}$ |                           |
| creatine kinase activity                                 | GO:0004111 | $3.565 \times 10^{-2}$ |                           |
| phosphotransferase activity, nitrogenous group as acc... | GO:0016775 | $4.984 \times 10^{-2}$ |                           |

2B

| Target name                                            | Term ID    | P(adj)                 | $-\log_{10}(\text{Padj})$ |
|--------------------------------------------------------|------------|------------------------|---------------------------|
| muscle contraction                                     | GO:0006936 | $2.332 \times 10^{-7}$ |                           |
| ATP metabolic process                                  | GO:0046034 | $5.975 \times 10^{-7}$ |                           |
| muscle system process                                  | GO:0003012 | $2.284 \times 10^{-6}$ |                           |
| generation of precursor metabolites and energy         | GO:0006091 | $1.307 \times 10^{-5}$ |                           |
| actin-myosin filament sliding                          | GO:0033275 | $1.631 \times 10^{-4}$ |                           |
| oxidative phosphorylation                              | GO:0006119 | $1.102 \times 10^{-3}$ |                           |
| proton transmembrane transport                         | GO:1902600 | $1.842 \times 10^{-3}$ |                           |
| aerobic electron transport chain                       | GO:0019646 | $2.231 \times 10^{-3}$ |                           |
| mitochondrial ATP synthesis coupled electron transport | GO:0042775 | $3.453 \times 10^{-3}$ |                           |
| ATP synthesis coupled electron transport               | GO:0042773 | $3.453 \times 10^{-3}$ |                           |
| striated muscle contraction                            | GO:0006941 | $3.613 \times 10^{-3}$ |                           |
| nucleoside diphosphate phosphorylation                 | GO:0006165 | $4.675 \times 10^{-3}$ |                           |

2C

| Target name                   | Term ID    | P(adj)                 | $-\log_{10}(\text{Padj})$ |
|-------------------------------|------------|------------------------|---------------------------|
| contractile fiber             | GO:0043292 | $6.239 \times 10^{-7}$ |                           |
| myofilament                   | GO:0036379 | $6.383 \times 10^{-7}$ |                           |
| sarcomere                     | GO:0030017 | $4.462 \times 10^{-6}$ |                           |
| myofibril                     | GO:0030016 | $9.320 \times 10^{-6}$ |                           |
| striated muscle thin filament | GO:0005865 | $3.515 \times 10^{-5}$ |                           |
| respiratory chain complex     | GO:0098803 | $4.514 \times 10^{-4}$ |                           |
| cytochrome complex            | GO:0070069 | $4.718 \times 10^{-4}$ |                           |
| respirasome                   | GO:0070469 | $7.479 \times 10^{-4}$ |                           |
| cytoplasm                     | GO:0005737 | $7.672 \times 10^{-4}$ |                           |
| supramolecular fiber          | GO:0099512 | $1.870 \times 10^{-3}$ |                           |
| supramolecular polymer        | GO:0099081 | $2.018 \times 10^{-3}$ |                           |
| mitochondrial inner membrane  | GO:0005743 | $2.974 \times 10^{-3}$ |                           |

Supplementary Figure S2. The top 12 enrichments of the biological processes from the Gene Ontology enrichment annotation of male brain from THC-exposed medaka. 2A) Enrichment of biological processes. 2B) Enrichment of molecular function. 2C) Enrichment of cellular components.

3A

| Target name                                              | Term ID    | P(adj)                 | $-\log_{10}(\text{Padj})$ |
|----------------------------------------------------------|------------|------------------------|---------------------------|
| oxidoreduction-driven active transmembrane transpor...   | GO:0015453 | $1.362 \times 10^{-5}$ |                           |
| cytochrome-c oxidase activity                            | GO:0004129 | $2.604 \times 10^{-5}$ |                           |
| oxidoreductase activity, acting on a heme group of do... | GO:0016675 | $3.091 \times 10^{-5}$ |                           |
| active ion transmembrane transporter activity            | GO:0022853 | $5.218 \times 10^{-5}$ |                           |
| electron transfer activity                               | GO:0009055 | $1.335 \times 10^{-4}$ |                           |
| proton transmembrane transporter activity                | GO:0015078 | $1.468 \times 10^{-4}$ |                           |
| active transmembrane transporter activity                | GO:0022804 | $4.370 \times 10^{-4}$ |                           |
| primary active transmembrane transporter activity        | GO:0015399 | $5.725 \times 10^{-4}$ |                           |
| inorganic cation transmembrane transporter activity      | GO:0022890 | $3.091 \times 10^{-3}$ |                           |
| cation transmembrane transporter activity                | GO:0008324 | $4.646 \times 10^{-3}$ |                           |
| inorganic molecular entity transmembrane transporter...  | GO:0015318 | $8.086 \times 10^{-3}$ |                           |
| ion transmembrane transporter activity                   | GO:0015075 | $1.675 \times 10^{-2}$ |                           |

3B

| Target name                                              | Term ID    | P(adj)                 | $-\log_{10}(\text{Padj})$ |
|----------------------------------------------------------|------------|------------------------|---------------------------|
| aerobic electron transport chain                         | GO:0019646 | $1.161 \times 10^{-4}$ |                           |
| mitochondrial electron transport, cytochrome c to oxy... | GO:0006123 | $1.589 \times 10^{-4}$ |                           |
| ATP synthesis coupled electron transport                 | GO:0042773 | $1.656 \times 10^{-4}$ |                           |
| mitochondrial ATP synthesis coupled electron transport   | GO:0042775 | $1.656 \times 10^{-4}$ |                           |
| ATP metabolic process                                    | GO:0046034 | $2.141 \times 10^{-4}$ |                           |
| respiratory electron transport chain                     | GO:0022904 | $3.578 \times 10^{-4}$ |                           |
| oxidative phosphorylation                                | GO:0006119 | $8.341 \times 10^{-4}$ |                           |
| electron transport chain                                 | GO:0022900 | $1.967 \times 10^{-3}$ |                           |
| aerobic respiration                                      | GO:0009060 | $2.782 \times 10^{-3}$ |                           |
| generation of precursor metabolites and energy           | GO:0006091 | $3.983 \times 10^{-3}$ |                           |
| cellular respiration                                     | GO:0045333 | $6.312 \times 10^{-3}$ |                           |
| energy derivation by oxidation of organic compounds      | GO:0015980 | $2.232 \times 10^{-2}$ |                           |

3C

| Target name                                 | Term ID    | P(adj)                 | $-\log_{10}(\text{Padj})$ |
|---------------------------------------------|------------|------------------------|---------------------------|
| cytochrome complex                          | GO:0070069 | $5.802 \times 10^{-7}$ |                           |
| respiratory chain complex                   | GO:0098803 | $1.647 \times 10^{-5}$ |                           |
| respirasome                                 | GO:0070469 | $2.487 \times 10^{-5}$ |                           |
| respiratory chain complex IV                | GO:0045277 | $4.049 \times 10^{-5}$ |                           |
| mitochondrial respiratory chain complex III | GO:0005750 | $2.740 \times 10^{-3}$ |                           |
| respiratory chain complex III               | GO:0045275 | $2.740 \times 10^{-3}$ |                           |
| mitochondrial inner membrane                | GO:0005743 | $1.286 \times 10^{-2}$ |                           |
| organelle inner membrane                    | GO:0019866 | $2.018 \times 10^{-2}$ |                           |
| envelope                                    | GO:0031975 | $3.762 \times 10^{-2}$ |                           |
| organelle envelope                          | GO:0031967 | $3.762 \times 10^{-2}$ |                           |

Supplementary Figure S3. Top 12 enrichments of the biological processes from the Gene Ontology enrichment annotation of testis from  $\Delta^9$ -THC-exposed medaka. 3A) Enrichment of biological processes. 3B) Enrichment of molecular function. 3C) Enrichment of cellular component.

#### 4A

| Target name                                              | Term ID    | P(adj)                 | $-\log_{10}(\text{Padj})$                                                           |
|----------------------------------------------------------|------------|------------------------|-------------------------------------------------------------------------------------|
| cyclin-dependent protein serine/threonine kinase regu... | GO:0016538 | $2.588 \times 10^{-4}$ |  |
| protein kinase regulator activity                        | GO:0019887 | $2.091 \times 10^{-2}$ |  |
| kinase regulator activity                                | GO:0019207 | $3.043 \times 10^{-2}$ |  |

#### 4B

|                                                          |            |                        |                                                                                     |
|----------------------------------------------------------|------------|------------------------|-------------------------------------------------------------------------------------|
| regulation of cyclin-dependent protein serine/threoni... | GO:0000079 | $1.228 \times 10^{-2}$ |  |
| regulation of cyclin-dependent protein kinase activity   | GO:1904029 | $1.394 \times 10^{-2}$ |  |
| mitotic cell cycle phase transition                      | GO:0044772 | $4.180 \times 10^{-2}$ |  |

#### 4C

|                                                          |            |                        |                                                                                     |
|----------------------------------------------------------|------------|------------------------|-------------------------------------------------------------------------------------|
| cyclin-dependent protein kinase holoenzyme complex       | GO:0000307 | $1.202 \times 10^{-4}$ |  |
| cyclin A2-CDK2 complex                                   | GO:0097124 | $2.369 \times 10^{-4}$ |  |
| serine/threonine protein kinase complex                  | GO:1902554 | $1.092 \times 10^{-3}$ |  |
| protein kinase complex                                   | GO:1902911 | $1.794 \times 10^{-3}$ |  |
| transferase complex, transferring phosphorus-containi... | GO:0061695 | $2.902 \times 10^{-2}$ |  |

*Supplementary Figure S4. Gene Ontology enrichment annotation of the female brain. 4A) Enrichment of biological processes. 4 B) Enrichment of molecular function. 4C) Enrichment of cellular components.*

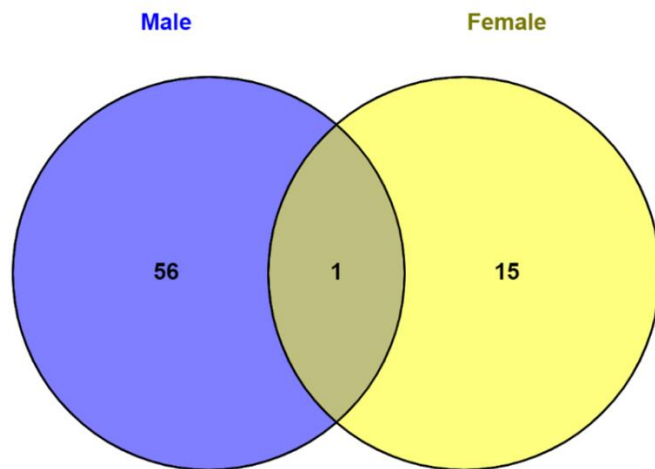

*Supplementary Figure S5. Venn diagram of DEG in males and female showed a unique set of genes differentially expressed in THC-exposed medaka*
